# Supplementary material for: Mechanochemical redox: a calcination-free process to support CoMnOx catalysts
Source: Royal Society of Chemistry journal article supplement (doi:10.1039/d0cy01121e), 2020-01-01
Supplement: d0cy01121e1.pdf [file d0cy01121e1.pdf]

## Supporting Information

# Mechanochemical Redox: A Calcination-free Process to Support CoMnO<sub>x</sub> Catalysts

Jiafeng Bao<sup>a</sup>, Jinbin Cheng<sup>b</sup>, Xueming Wang<sup>b</sup>, Shize Yang<sup>b,\*</sup>, Pengfei Zhang<sup>a,\*</sup>

<sup>a</sup> School of Chemistry and Chemical Engineering, Shanghai Jiao Tong University, Shanghai 200240, China. E-mail:

[chemistryzpf@sjtu.edu.cn](mailto:chemistryzpf@sjtu.edu.cn)

<sup>b</sup> The 718th research institute of China State Shipbuilding Corporation Limited, Handan City, Hebei Province,

China

<sup>c</sup> Eyring Materials Center, Arizona State University, Tempe, AZ 85287, USA. E-mail: syang212@asu.edu

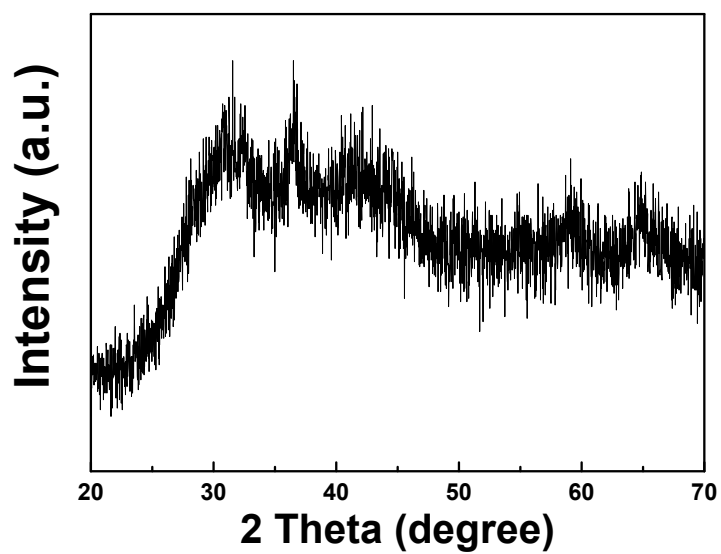

**Figure S1.** XRD patterns of CoMnO<sub>x</sub>-300 catalysts.

**Table S1**

The specific surface area of TiO<sub>2</sub> support after ball milling for 0.5 h, 1 h and 1.5 h.

| Ball milling time | Specific surface area (m <sup>2</sup> g <sup>-1</sup> ) |
|-------------------|---------------------------------------------------------|
| 0.5 h             | 55                                                      |
| 1.0 h             | 51                                                      |
| 1.5 h             | 49                                                      |
